# Supplementary material for: The propensity of recrystallization solvents to form solvates
Source: Royal Society of Chemistry journal article supplement (doi:10.1039/d4ce00640b), 2025-01-01
Supplement: d4ce00640b1.pdf [file d4ce00640b1.pdf]

## COMMUNICATION

### The propensity of recrystallization solvents to form solvates

Michał Kaźmierczak,<sup>\*a</sup> and Ewa Patyk-Kaźmierczak<sup>a</sup>

Received 00th January 20xx,  
Accepted 00th January 20xx

<sup>a</sup> Faculty of Chemistry, Adam Mickiewicz University, Poznań. Uniwersytetu Poznańskiego 8 61-614 Poznań, Poland. E-mail: [kax@amu.edu.pl](mailto:kax@amu.edu.pl)

DOI: 10.1039/x0xx00000x

### Supporting Information

Table S1. Statistical parameters of the number of non-hydrogen atoms ( $N_{nH}$ ) of the largest entity in the structure for entirety of the CSD, entirety of solvates deposited in CSD (all solvates) and for the crystals where one of the ten most commonly incorporated recrystallization solvents were used and is present in the final crystal.

|                 | mean      | median | standard deviation | coefficient of variation |
|-----------------|-----------|--------|--------------------|--------------------------|
| CSD             | 41.17536  | 32     | 35.902462          | 0.87194                  |
| solvates        | 56.918001 | 48     | 37.248712          | 0.654428                 |
| dichloromethane | 56.979104 | 51     | 30.126015          | 0.52872                  |
| water           | 38.507633 | 29     | 31.89262           | 0.828216                 |
| acetonitrile    | 61.788018 | 49     | 44.77383           | 0.724636                 |
| chloroform      | 61.564345 | 51     | 38.43149           | 0.624249                 |
| methanol        | 54.910707 | 44     | 38.761138          | 0.705894                 |
| tetrahydrofuran | 57.260625 | 50     | 31.097178          | 0.543081                 |
| toluene         | 68.473496 | 58     | 38.476407          | 0.561917                 |
| benzene         | 58.406905 | 52     | 30.716771          | 0.52591                  |
| ether           | 62.203689 | 55     | 32.131499          | 0.516553                 |
| acetone         | 54.164778 | 46     | 33.442632          | 0.617424                 |

Table S2. Statistical parameters of the number of non-hydrogen atoms ( $N_{NH}$ ) of the largest entity in the structure for entirety of the CSD, entirety of cases with recrystallization solvent reported but where solvate was not formed (all *non-solvates*) and for the crystals where one of the ten most commonly incorporated recrystallization solvents were used and is not present in the final crystal.

|                         | mean      | median | standard deviation | coefficient of variation |
|-------------------------|-----------|--------|--------------------|--------------------------|
| CSD                     | 41.17536  | 32     | 35.902462          | 0.87194                  |
| all <i>non-solvates</i> | 37.696377 | 31     | 27.654569          | 0.733613                 |
| dichloromethane         | 38.700842 | 33     | 23.857872          | 0.616469                 |
| water                   | 29.411825 | 23     | 31.34678           | 1.065788                 |
| acetonitrile            | 40.190988 | 32     | 37.141412          | 0.924123                 |
| chloroform              | 37.277436 | 29     | 28.412207          | 0.762182                 |
| methanol                | 36.737067 | 28     | 30.786331          | 0.838018                 |
| tetrahydrofuran         | 43.097823 | 38     | 27.044274          | 0.627509                 |
| toluene                 | 42.003199 | 36     | 27.462929          | 0.653829                 |
| benzene                 | 40.523351 | 35     | 28.719561          | 0.708716                 |
| ether                   | 40.464731 | 34     | 29.088427          | 0.718859                 |
| acetone                 | 32.557498 | 26     | 24.261138          | 0.745178                 |

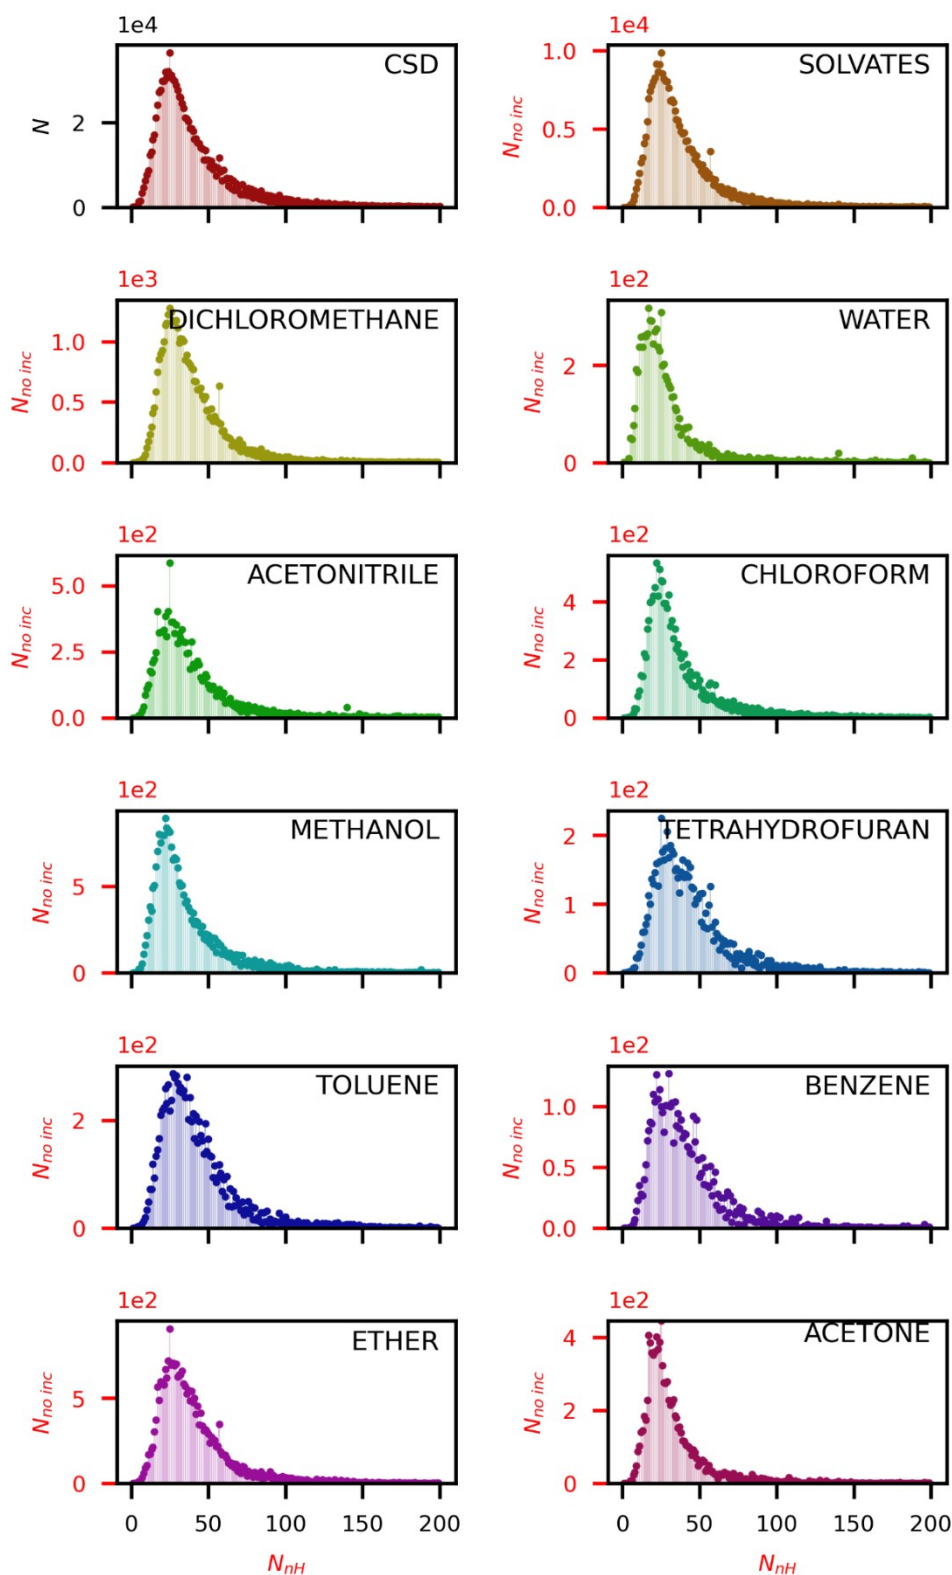

Figure S1. Distributions of the number of non-hydrogen atoms ( $n^H$ ) of the largest entity in the structure for entirety of the CSD, entirety of solvates deposited in the CSD (and non-solvates-where recrystallization solvent was reported but solvate was not formed), and for crystals where one of the ten most commonly incorporated recrystallization solvents was used and solvate was not formed. For clarity axes for all titles of plots were provided only on left, right and bottom of the figure.

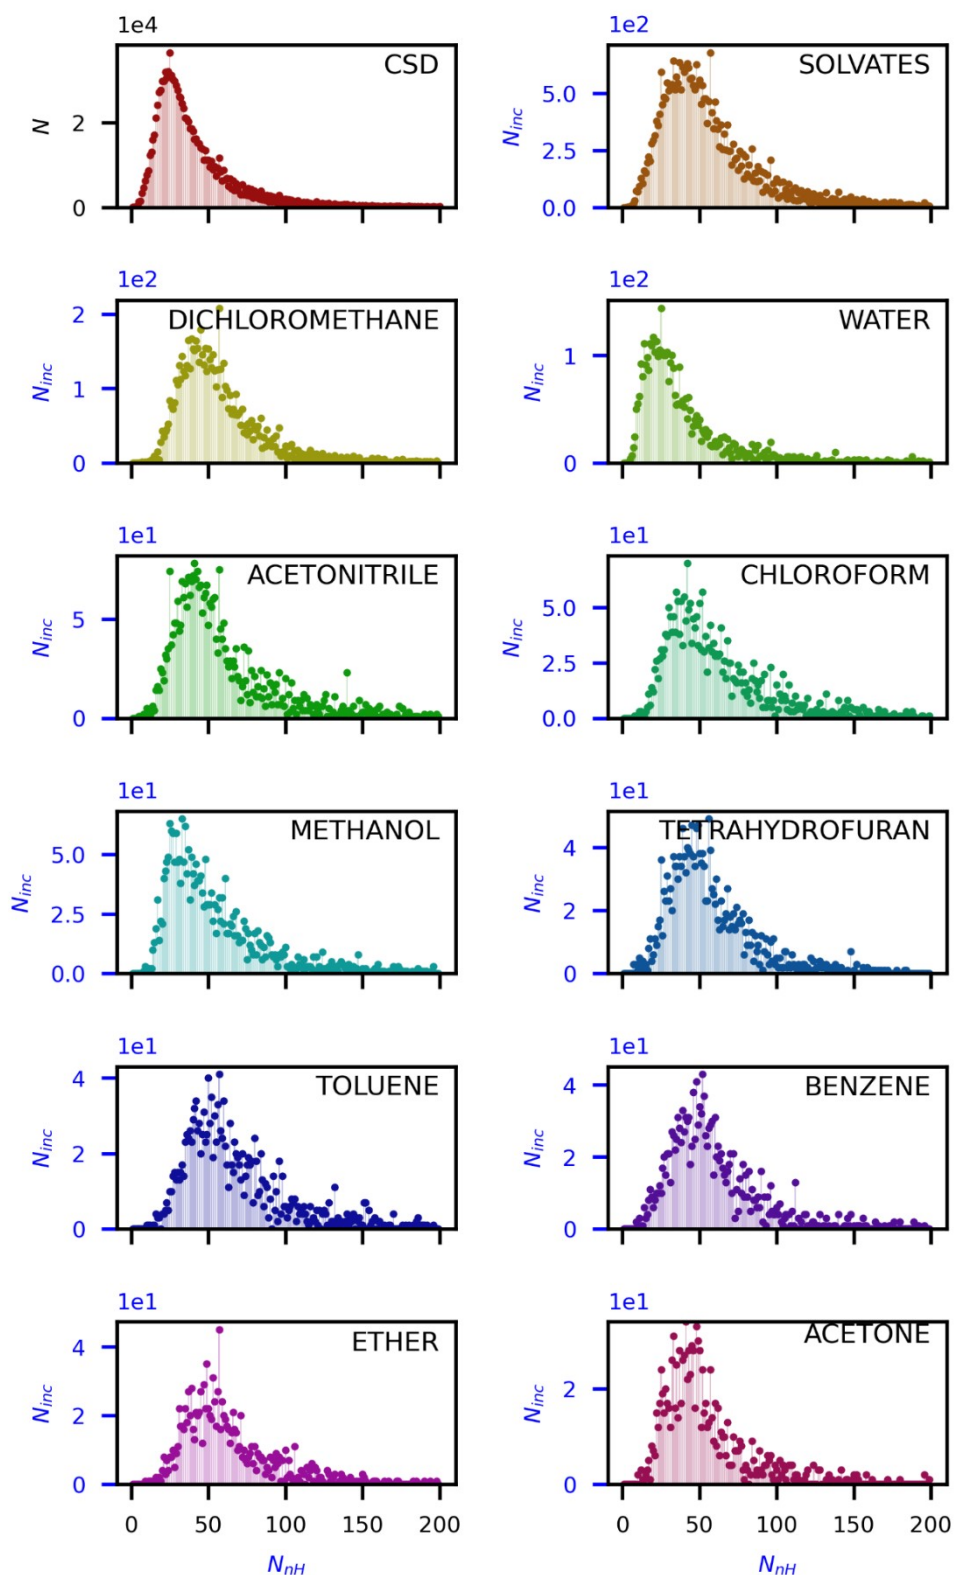

Figure S1. Distributions of the number of non-hydrogen atoms ( $nH$ ) of the largest entity in the structure for entirety of the CSD, entirety of solvates deposited in the CSD (and non-solvates-where recrystallization solvent was reported but solvate was not formed), and for crystals where one of the ten most commonly incorporated recrystallization solvents was used and it is present in the final crystal. For clarity axes for all titles of plots were provided only on left, right and bottom of the figure.
